# Supplementary material for: 7-Hydroxyflavone Alleviates Myocardial Ischemia/Reperfusion Injury in Rats by Regulating Inflammation
Source: MDPI journal article supplement (doi:10.3390/molecules27175371), 2022-08-23
Supplement: s1 [file s1]

**Table S1.** Effect of HF and DIL on Anatomic data in MI/RI rat ( $\bar{x} \pm s$ ).

| Parameters      | SHAM         | MI/RI        | MI/RI-DIL                 | MI/RI-LHF              | MI/RI-MHF                 | MI/RI-HHF                 |
|-----------------|--------------|--------------|---------------------------|------------------------|---------------------------|---------------------------|
| Numbers of rats | 16           | 15           | 15                        | 15                     | 16                        | 16                        |
| Initial BW (g)  | 174.44±3.20  | 174.60±2.67  | 175.33±3.13               | 174.93±3.79            | 174.81±3.37               | 175.06±2.81               |
| Final BW (g)    | 260.94±11.10 | 265.47±14.17 | 252.26±13.66              | 263.20±10.80           | 264.88±17.13              | 273.69±20.57              |
| HR (beats/min)  | 346.67±45.10 | 266.67±7.63* | 400.00±34.64 <sup>#</sup> | 343.33±70.95           | 410.00±28.35 <sup>#</sup> | 314.00±15.10 <sup>#</sup> |
| RHB (mg/g)      | 3.15±0.27    | 3.84±0.56*   | 3.81±0.4                  | 3.91±0.35              | 3.45±0.21 <sup>#</sup>    | 3.71±0.3 <sup>#</sup>     |
| RLIB (mg/g)     | 30.97±3.75   | 34.29±3.75*  | 33.37±3.63                | 35.07±1.92             | 31.13±3.44 <sup>#</sup>   | 31.71±2.81 <sup>#</sup>   |
| RLUB (mg/g)     | 5.10±0.52    | 5.43±0.38    | 4.97±0.62 <sup>#</sup>    | 5.27±0.50              | 5.01±0.47                 | 5.15±0.52 <sup>#</sup>    |
| RKB (mg/g)      | 3.56±0.31    | 4.03±0.37*   | 4.16±0.38                 | 4.24±0.31              | 3.95±0.39                 | 4.09±0.59                 |
| RSB (mg/g)      | 1.88±0.23    | 2.50±0.60*   | 2.08±0.35 <sup>#</sup>    | 1.81±0.24 <sup>#</sup> | 1.56±0.25 <sup>#</sup>    | 2.09±0.30 <sup>#</sup>    |
| RTB (mg/g)      | 1.65±0.25    | 2.10±0.29*   | 1.68±0.39 <sup>#</sup>    | 1.91±0.35              | 1.88±0.26 <sup>#</sup>    | 1.77±0.24 <sup>#</sup>    |

Results were expressed as mean  $\pm$  SD. Abbreviations used as are body weight (BW), heart rate (HR), the ratio of heart weight to body weight (RHB), the ratio of liver weight to body weight (RLIB), the ratio of lung weight to body weight (RLUB), the ratio of kidney weight to body weight (RKB), the ratio of spleen weight to body weight (RSB), the ratio of thymus weight to body weight (RTB). \*  $p < 0.05$  vs. SHAM group. <sup>#</sup> $p < 0.05$  vs. MI/RI group.
