# Supplementary material for: 7-Hydroxyflavone Alleviates Myocardial Ischemia/Reperfusion Injury in Rats by Regulating Inflammation
Source: MDPI journal article supplement (doi:10.3390/molecules27175371), 2022-08-23
Supplement: s1 [file s1]

**Table S2.** Outcomes of molecular docking.

| Ingredients | Targets | Affinity   | Distance from best mode |           |
|-------------|---------|------------|-------------------------|-----------|
|             |         | (kcal/mol) | rmsd l.b.               | rmsd u.b. |
| HF          | p38     | -8.3       | 0                       | 0         |
|             | ERK1/2  | -5.6       | 0                       | 0         |
|             | JNK     | -5.0       | 0                       | 0         |
|             | NK-κB   | -9.0       | 0                       | 0         |
