# Supplementary material for: 7-Hydroxyflavone Alleviates Myocardial Ischemia/Reperfusion Injury in Rats by Regulating Inflammation
Source: MDPI journal article supplement (doi:10.3390/molecules27175371), 2022-08-23
Supplement: s1 [file s1]

**Table S3.** Primer information of genes used for quantitative real-time PCR.

| Gene name | Primer  | Primers sequences 5'-3'  | Length (bp) | Temp. (°C) |
|-----------|---------|--------------------------|-------------|------------|
| NF-κB p65 | Forward | TACTTGCCAGACACAGAC       | 18          | 55.02      |
|           | Reverse | TGATGCTCTTGAAGGTCTC      | 19          | 55.41      |
| p38       | Forward | GCCTGTGCTGACCCCTATGACC   | 23          | 63.73      |
|           | Reverse | GGGGTGGTGGCACAAGCTGAT    | 22          | 63.8       |
| ERK1/2    | Forward | GAACTCCAAGGGCTATACCAAGT  | 23          | 50.17      |
|           | Reverse | GGAGGGCAGAGACTGTAGGTAGT  | 23          | 63.73      |
| JNK1      | Forward | GTGGGGTATGCCCAAGAGG      | 19          | 61.88      |
|           | Reverse | GCCATAAAGCCCAGATAGAGC    | 21          | 59.97      |
| β-Actin   | Forward | GGAGATTACTGCCCTGGCTCCTA  | 23          | 63.18      |
|           | Reverse | GACTCATCGTACTCCTGCTTGCTG | 24          | 63.25      |
